# Supplementary material for: Correlation between binding rate constants and individual information of E. coli Fis binding sites
Source: PubMed Central journal article supplement — Nucleic Acids Res. 2007 Jul 7;35(16):5275–83. doi: 10.1093/nar/gkm471 (PMC2018646; doi:10.1093/nar/gkm471), 2007-07-07
Supplement: nar_gkm471_1.pdf [file nar_gkm471_1.pdf]

# Supplement for: Correlation Between Binding Rate Constants and Individual Information of *E. coli* Fis Binding Sites

Ryan K. Shultzaberger <sup>\*†</sup>, Lindsey R. Roberts <sup>‡</sup>, Ilya G. Lyakhov <sup>§</sup>,  
Igor A. Sidorov <sup>\*</sup>, Andrew G. Stephen <sup>‡</sup>,  
Robert J. Fisher <sup>‡</sup>, and Thomas D. Schneider <sup>\*¶</sup>

version = 1.15 of fisbcsup.tex 2007 May 24

This document contains:

1. Fis binding sequences used in EMSA experiments - Fig. 1
2. Graphs of Fis binding rates vs. information - Fig. 2

## Computation of $K_D$ values

See reference [1] for definitions of symbols, methods and the equations used. The competitor EMSA experiments were repeated three times with different competitor concentrations ( $C_0$ ).  $K_{Dw}$  and  $R_0$  were simultaneously adjusted to fit two criteria. First, the  $K_D$  of the Hin-180 oligo was made to match the published value of Hin-D,  $2 \times 10^{-9}$  M [2]. Second, the  $K_{Dw}$  constant was made to match the computed  $K_D$  of the **con** oligo. The top and bottom bands (Figure 5) were quantitated using the ImageQuant program (Molecular Dynamics, Sunnyvale, CA). The  $K_{Dc}$ s were computed using the method given in [1] and the average  $K_{Dc}$ s and standard deviations were computed from the three values.

Additional supplementary files are:

- Fis-koff-raw-data.xls - The raw SPR data.
- Fis-kd-raw-data.xls - The raw EMSA data.
- Fis-kon-koff-kd-ri.xls - Combination of SPR and EMSA data, graphed in Fig. 2.

---

\*National Cancer Institute at Frederick, Center for Cancer Research Nanobiology Program

†Present address: Department of Molecular and Cell Biology, University of California, Berkeley, CA 94720, USA

‡The Protein Chemistry Laboratory, Advanced Technology Program, SAIC - Frederick, NCI - Frederick Bldg. 469, Rm 237 Frederick, MD 21782

§Basic Research Program, SAIC-Frederick, Inc., NCI-Frederick, Frederick, Maryland 21702.

¶*Corresponding author*; P. O. Box B, Frederick, MD 21702-1201. (301) 846-5581 (-5532 for messages), fax: (301) 846-5598, email: toms@ncifcrf.gov. <http://www.ccrnp.ncifcrf.gov/~toms/>

## References

- [1] I. G. Lyakhov, P. N. Hengen, D. Rubens, and T. D. Schneider. The P1 Phage Replication Protein RepA Contacts an Otherwise Inaccessible Thymine N3 Proton by DNA Distortion or Base Flipping. *Nucleic Acids Res.*, 29(23):4892–4900, 2001.  
<http://www.ccrnp.ncifcrf.gov/~toms/paper/repan3/>.
- [2] C. Q. Pan, S. E. Finkel, S. E. Cramton, J. A. Feng, D. S. Sigman, and R. C. Johnson. Variable structures of Fis-DNA complexes determined by flanking DNA-protein contacts. *J. Mol. Biol.*, 264:675–695, 1996.

Sequences used for EMSA Experiments

| #  | Ri (bits) | Name           | Sequence                               |
|----|-----------|----------------|----------------------------------------|
| 1  | -30.6     | anti-con       | CTGACCCCGGGTCAGGCGAAGCCTGACCCGGGGTCAG  |
| 3  | 4.9       | cin-336        | GTCTAACTTCCATACGCGAAGCGTATGGAAGTTAGAC  |
| 2  | 5.4       | hin-1096       | GAACAAATCCCAGTCGCGAAGCGACTGGGATTTGTTC  |
| 4  | 6.6       | lacP-560       | GCTCACTCATTAGGCGCGAAGCGCCTAATGAGTGAGC  |
| 6  | 8.2       | ndhII-188      | GCCTATCTTTTCAGCGCGAAGCGCTGAAAAGATAGGC  |
| 7  | 8.2       | comp-ndhII-188 | GCTGAAAAGATAGGCGCGAAGCGCCTATCTTTTCAGC  |
| 9  | 10.1      | fis-333        | GGTCAAAGTTTGGCCGCGAAGCGCCAAACTTTGACC   |
| 8  | 10.2      | tgt-1824       | GCTAAAAAATTCATCGCGAAGCGATGAATTTTTTAGC  |
| 5  | 10.4      | hin-180        | GGTCACAATTTGCACGCGAAGCGTGCAAATTTGTGACC |
| 10 | 10.9      | thrU-87        | GGTCACATTTTATGCGCGAAGCGCATAAAATGTGACC  |
| 11 | 12.7      | ndhI-137       | GCTCAAATAATAAACGCGAAGCGTTTATTATTTGAGC  |
| 12 | 12.8      | mut-con        | GGTTAAATGTTAACCGCGAAGCGGTTAACATTTAACC  |
| 13 | 14.9      | con            | GGTTAAATTTTAACCGCGAAGCGGTTAAAATTTAACC  |

Figure 1: Fis binding sequences used in EMSA experiments.

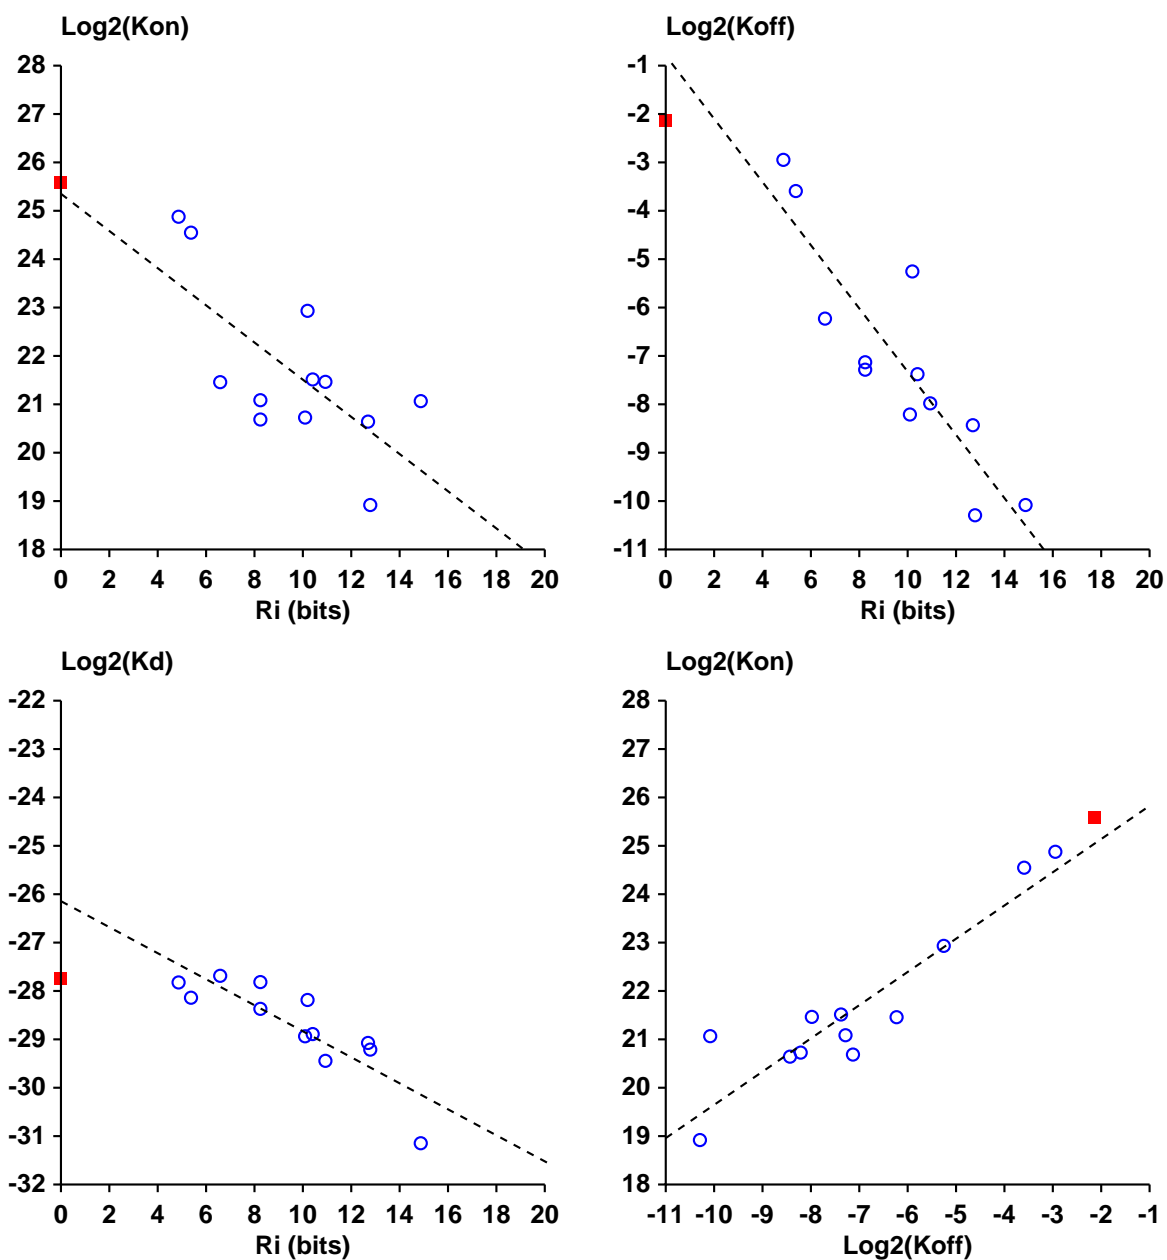

Figure 2: Fis binding rates versus information.

The axes of each rate graph always covers 10 powers of 2 so that the slopes of the regression lines can be compared.  $k_{off}$  values were averaged for each oligo. The anti-con oligo is plotted at 0 bits as a square but was not included in the regressions.
